# Supplementary material
Source: HighWire-hosted journal article supplement (https://hw-f5-jim.highwire.org/content/66/3/684)
Supplement: inline-supplementary-material-1 [file inline-supplementary-material-1.docx]

**Supplement Table 1.** Years of follow-ups

| Group | Median | interquartile range |
| --- | --- | --- |
| With dementia | 2.52 | 0.02-3.17 |
| With medication | 2.72 | 0.06-3.46 |
| Without medication | 2.13 | 0.01-2.98 |
| Without dementia | 4.48 | 0.38-6.08 |
| Total | 3.76 | 0.20-5.05 |
